# Supplementary material
Source: PubMed Central journal article supplement (PMC3234801)
Supplement: supp_M111.287268_jbc.M111.287268-1.pdf [file supp_M111.287268_jbc.M111.287268-1.pdf]

## Supplementary Figure Legends

Supplemental Fig.1

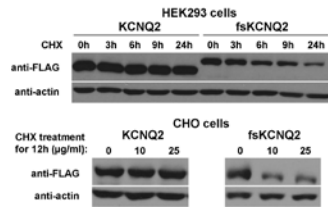

**S figure 1. Accelerated degradation of fsKCNQ2 mutant proteins in HEK293 and CHO cells.** Upper panels, transfected HEK293 cells were treated with CHX (75 µg/ml) for various time periods (0, 3, 6, 9 or 24 h). Proteins were extracted and separated by SDS-PAGE before Western blotted with anti-FLAG or -actin antibody. Lower panels, transfected CHO cells were treated with CHX at 10 or 25 µg/ml for 12 hours, and proteins were extracted and separated by SDS-PAGE before Western blotted with anti-FLAG or -actin antibody.

Supplemental Fig.2

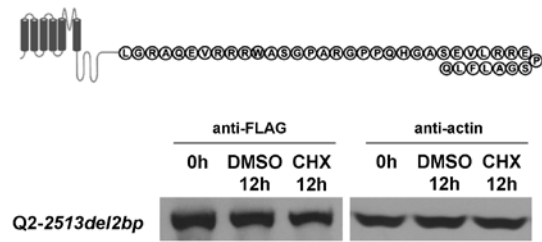

**S figure 2. The ExtraC peptide is a specific degradation signal for fsKCNQ2.** Cos-7 cells expressing FLAG -Q2-2513del2bp mutant proteins were treated with CHX (75  $\mu\text{g/ml}$ ) for 0 or 12 h, or with vehicle (0.75% DMSO) for 12 h. Extracted proteins were separated by SDS-PAGE and Western blotted with anti-FLAG or anti-actin antibody. The schematic picture shows that the extra C-terminal region of FLAG -Q2-2513del2bp mutant doesn't contain the RCXRG motif. The data were obtained from the same experiment with positive and negative control (KCNQ2 & fsKCNQ2) of Figure 6.
